# Supplementary material for: QSAR Studies, Molecular Docking, Molecular Dynamics, Synthesis, and Biological Evaluation of Novel Quinolinone-Based Thiosemicarbazones against Mycobacterium tuberculosis
Source: MDPI journal article supplement (doi:10.3390/antibiotics12010061), 2022-12-29
Supplement: s1 [file s1]

## Supplementary Materials

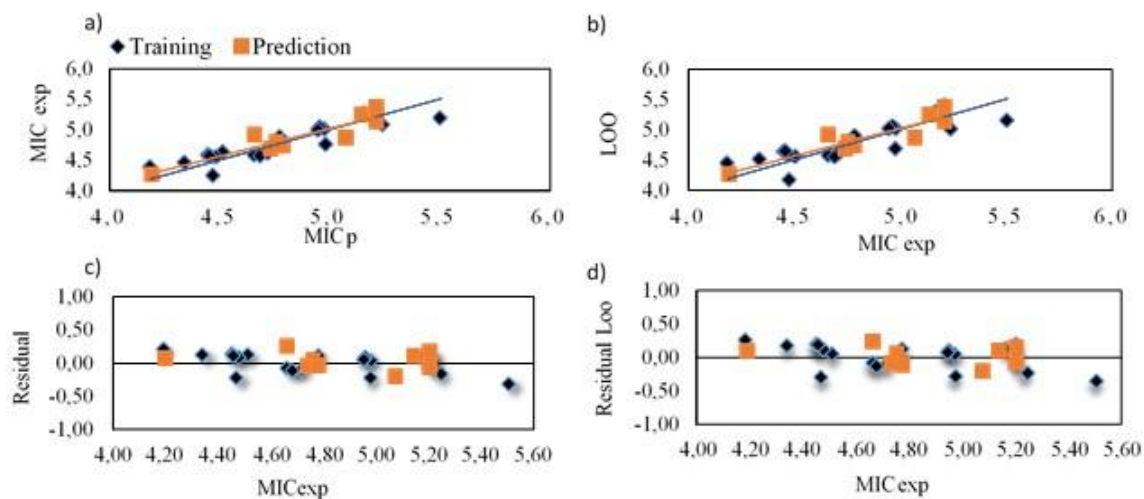

**Figure S1.** a) Parity diagram MIC exp versus MICp; b) Parity diagram QLooc vs MIC exp; c) graphic residual vs MIC exp; d) graphic residual QLooc vs MIC exp.

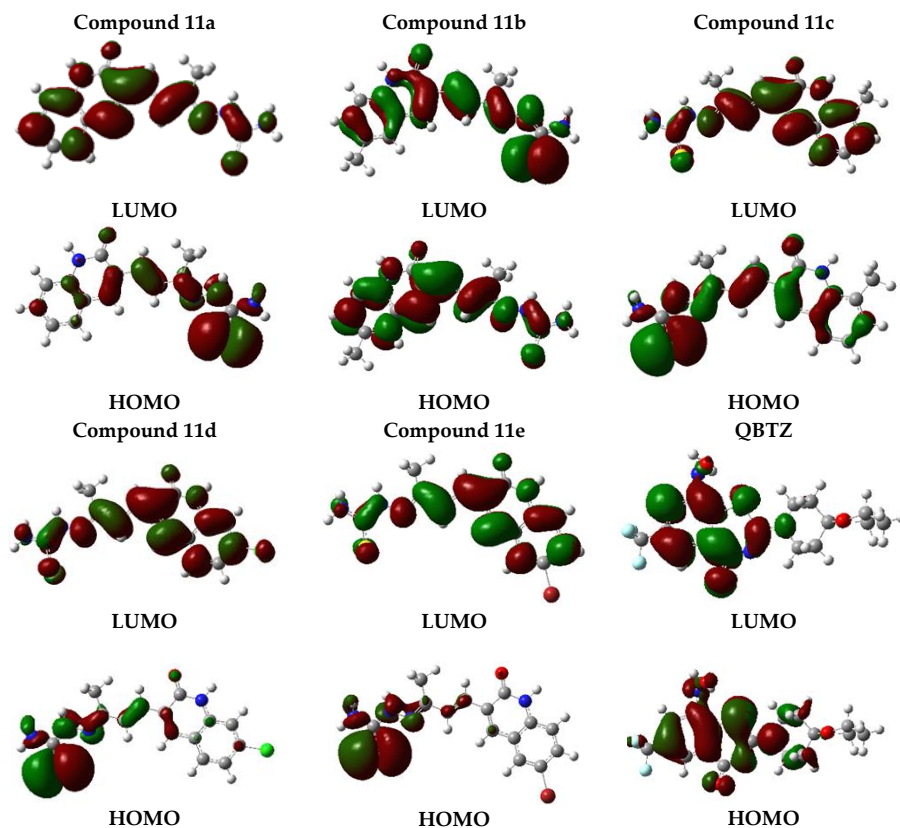

**Figure S2.** The frontier orbital for the designed compounds 11a-e from the QSAR model. HOMO: Highest occupied molecular orbital; LUMO: low unoccupied molecular orbital. BTZ: Benzothiazinone derivatives.

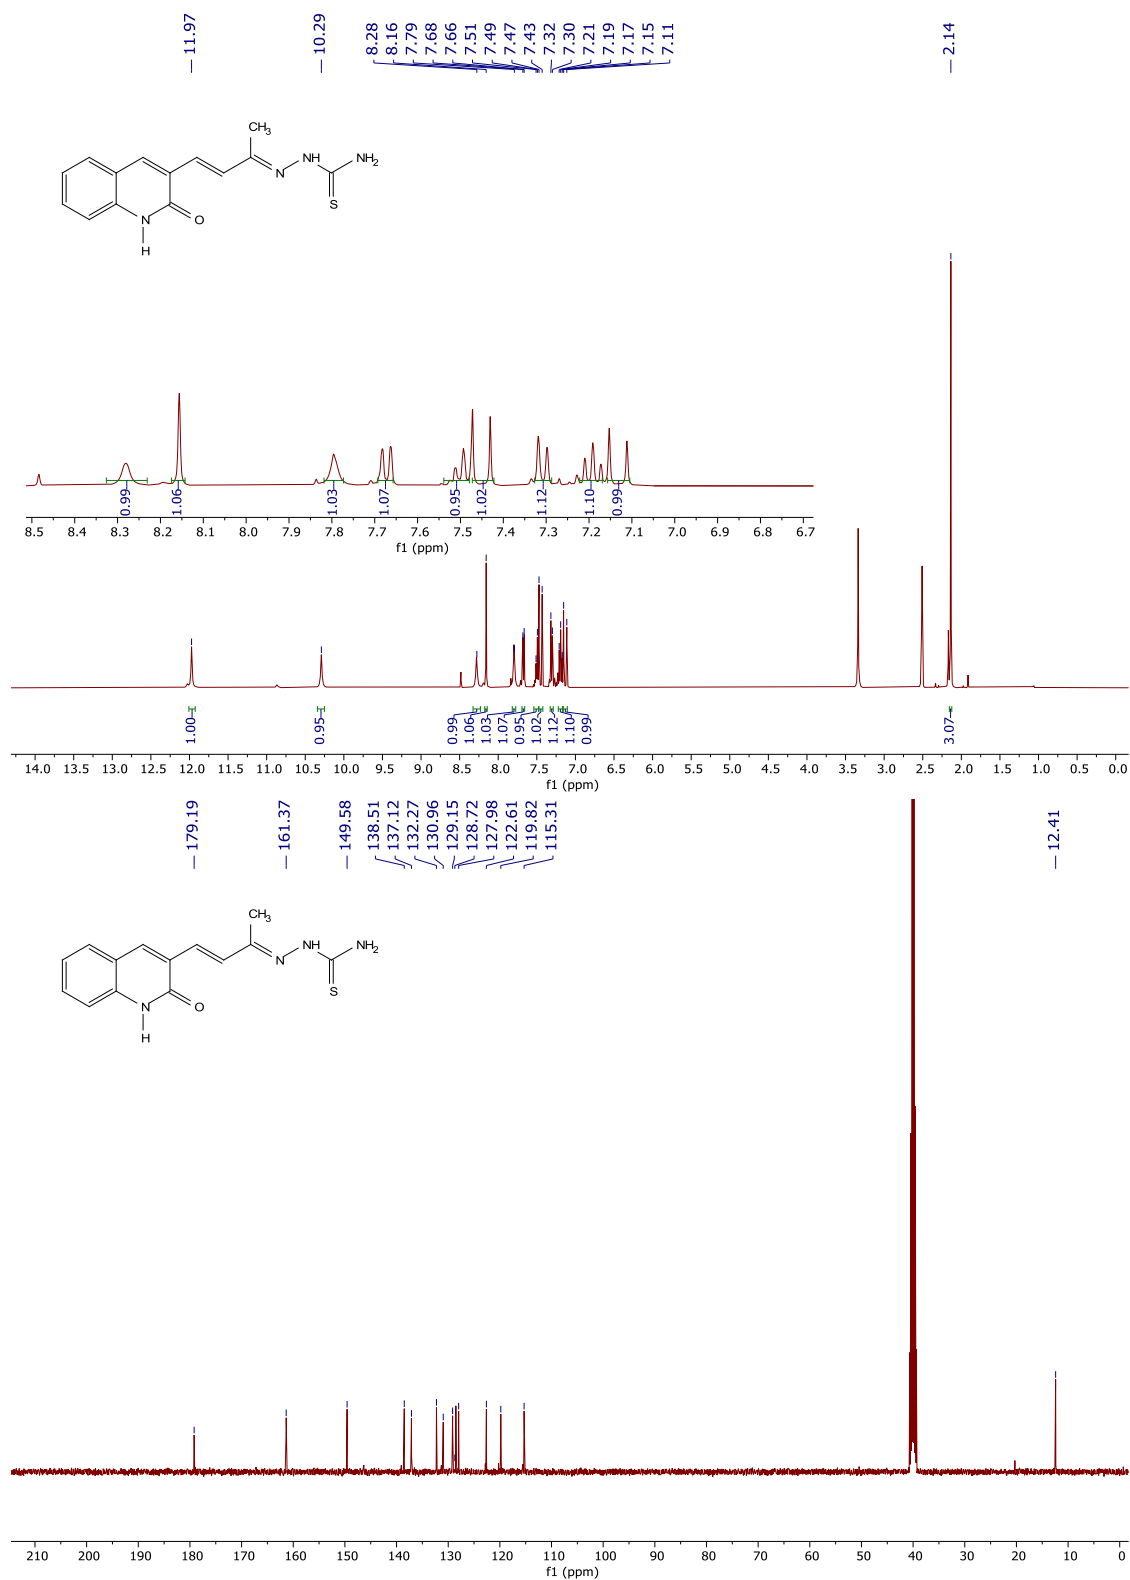

Figure S3. <sup>1</sup>H and <sup>13</sup>C NMR spectrum of 11a

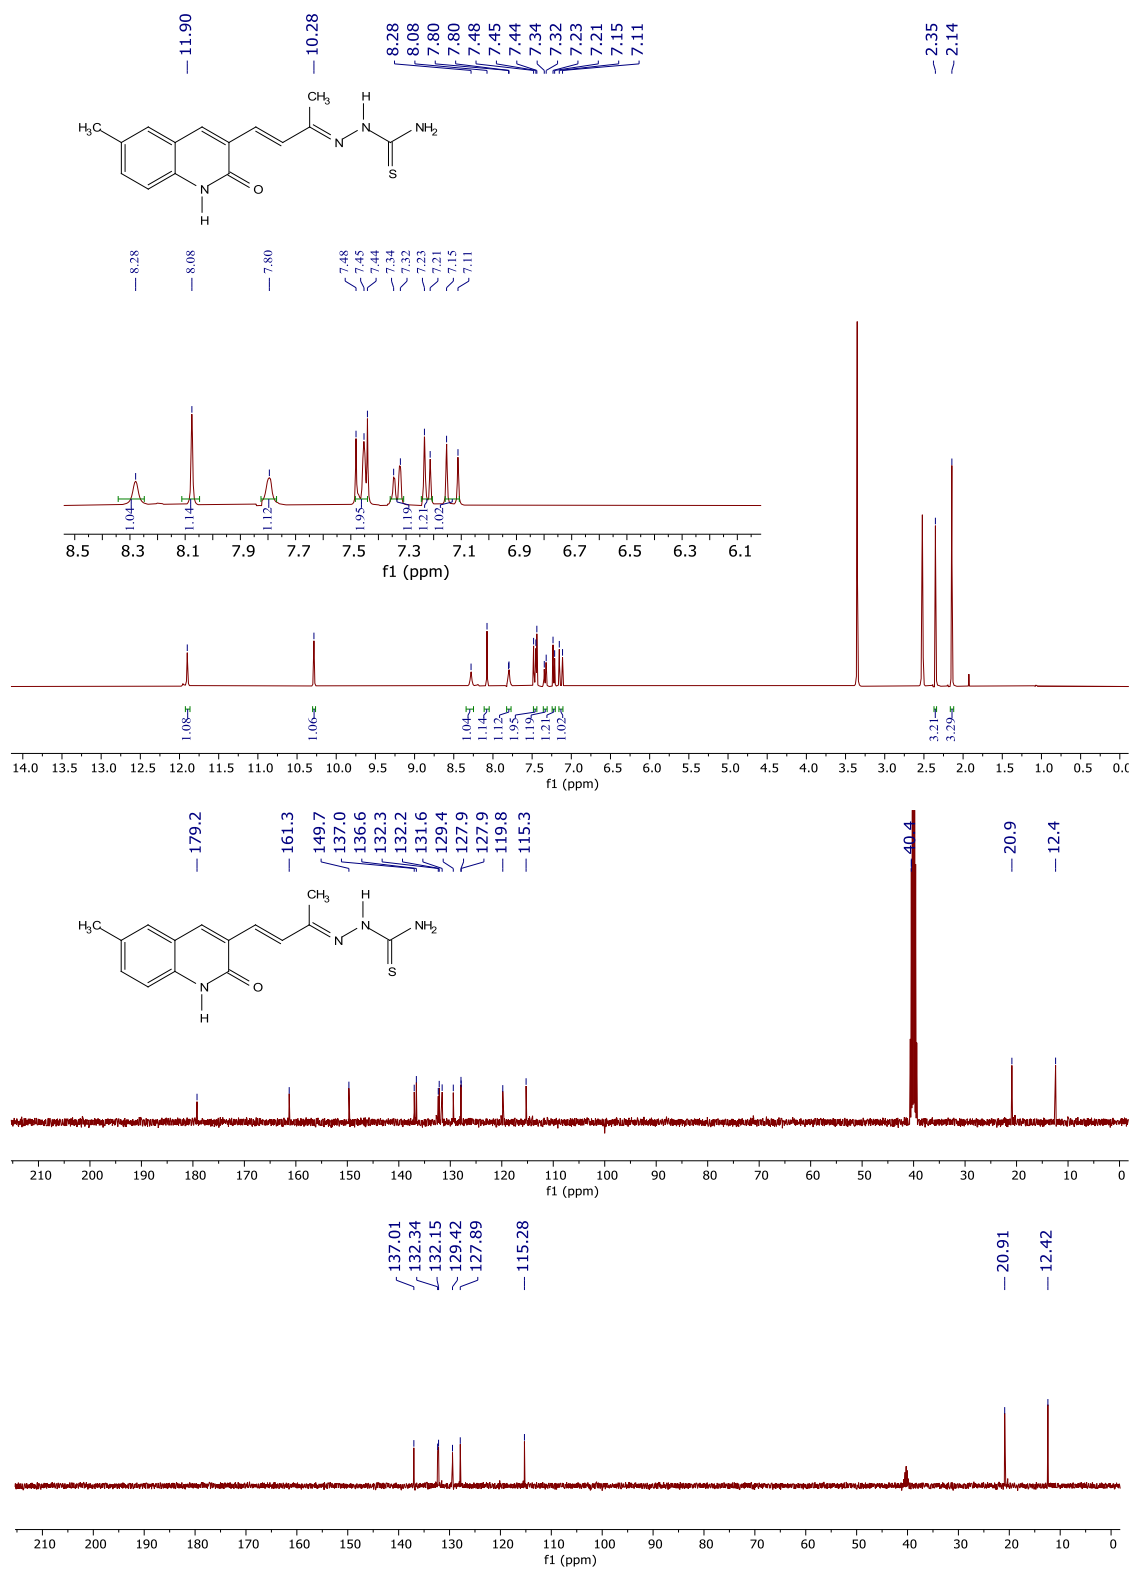

Figure S4. <sup>1</sup>H, <sup>13</sup>C NMR and DEPT 135 NMR spectrum of 11b

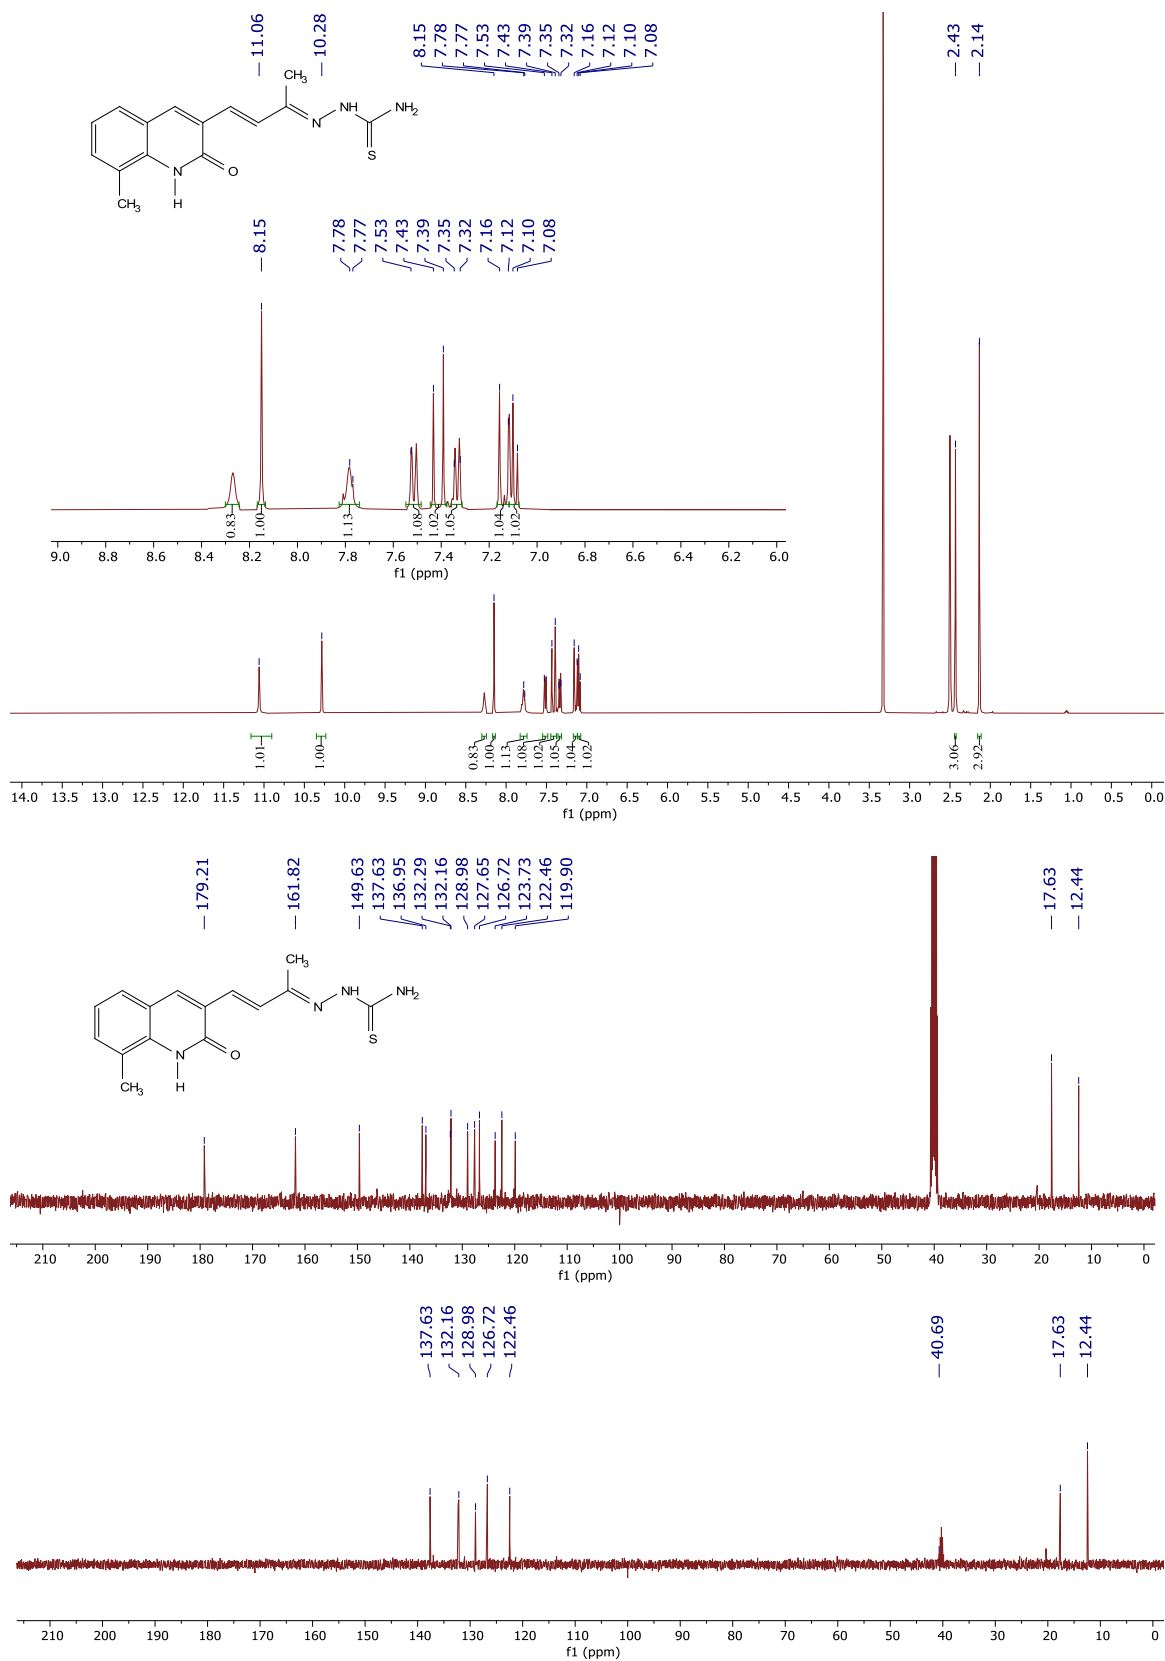

**Figure S5.** <sup>1</sup>H, <sup>13</sup>C NMR and DEPT 135 NMR spectrum of **11c**

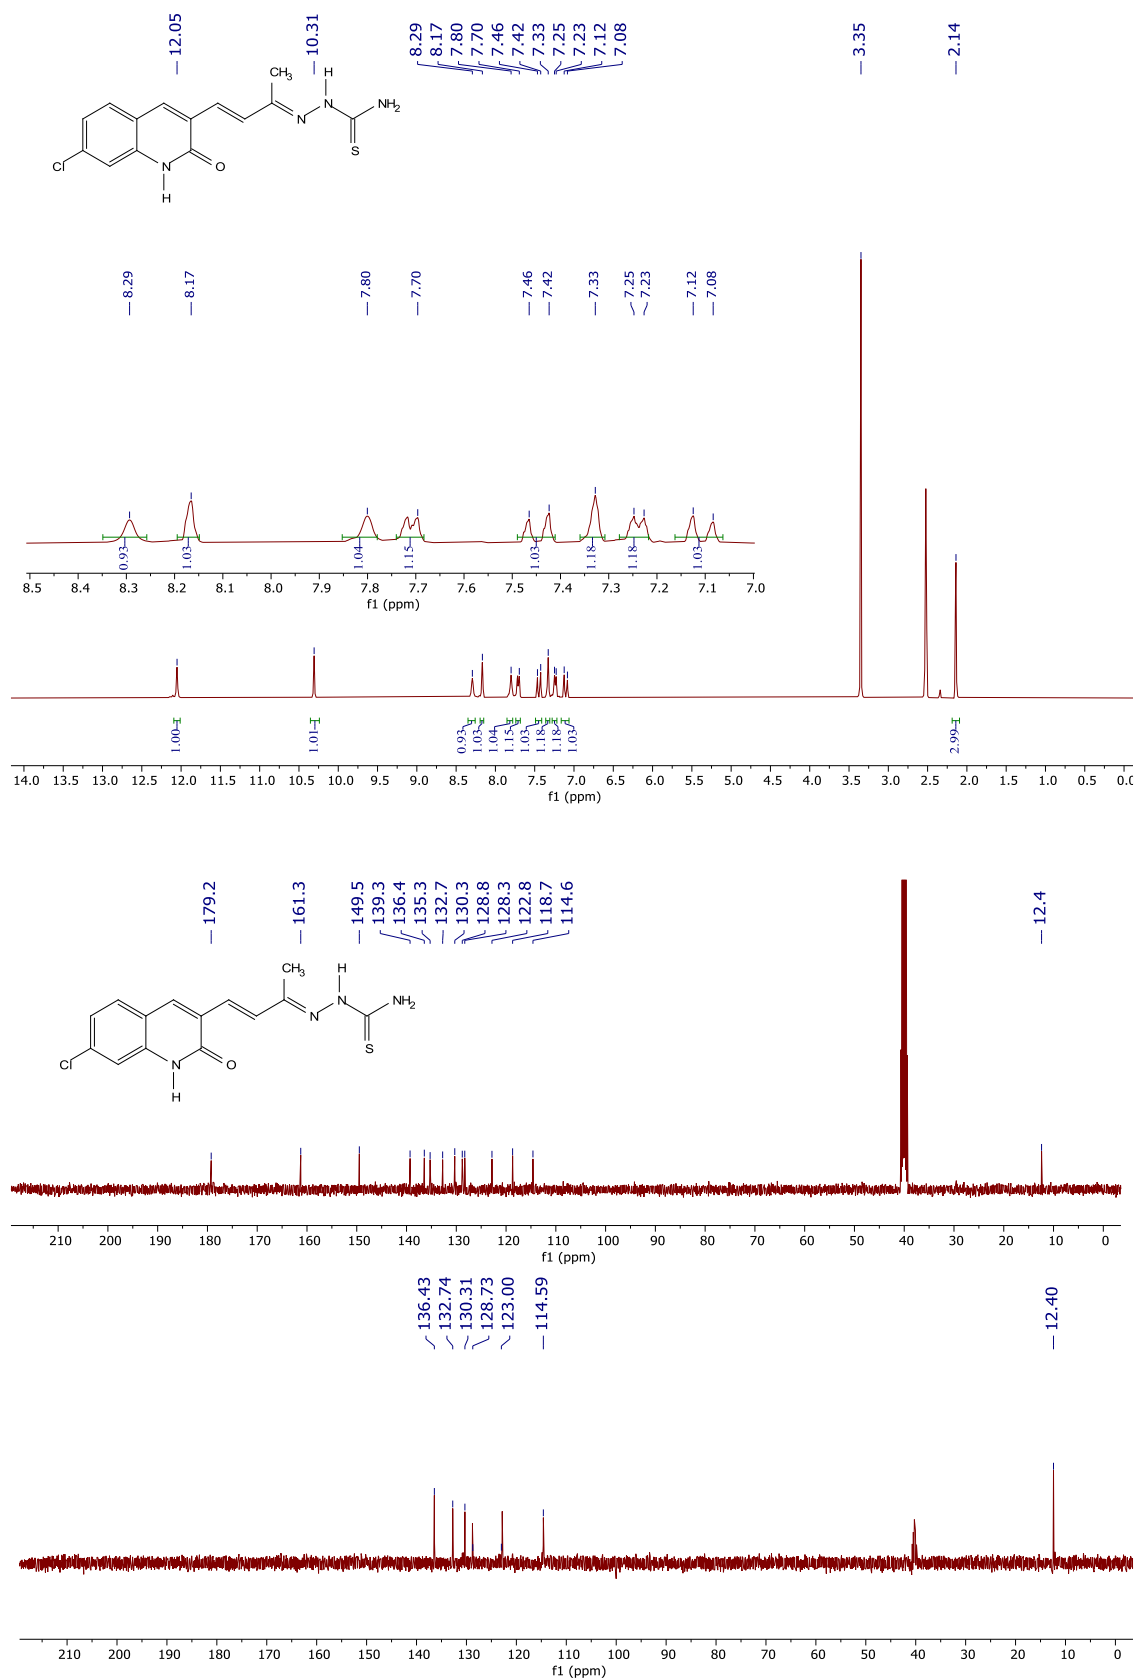

**Figure S6.** <sup>1</sup>H, <sup>13</sup>C NMR and DEPT 135 NMR spectrum of **11d**

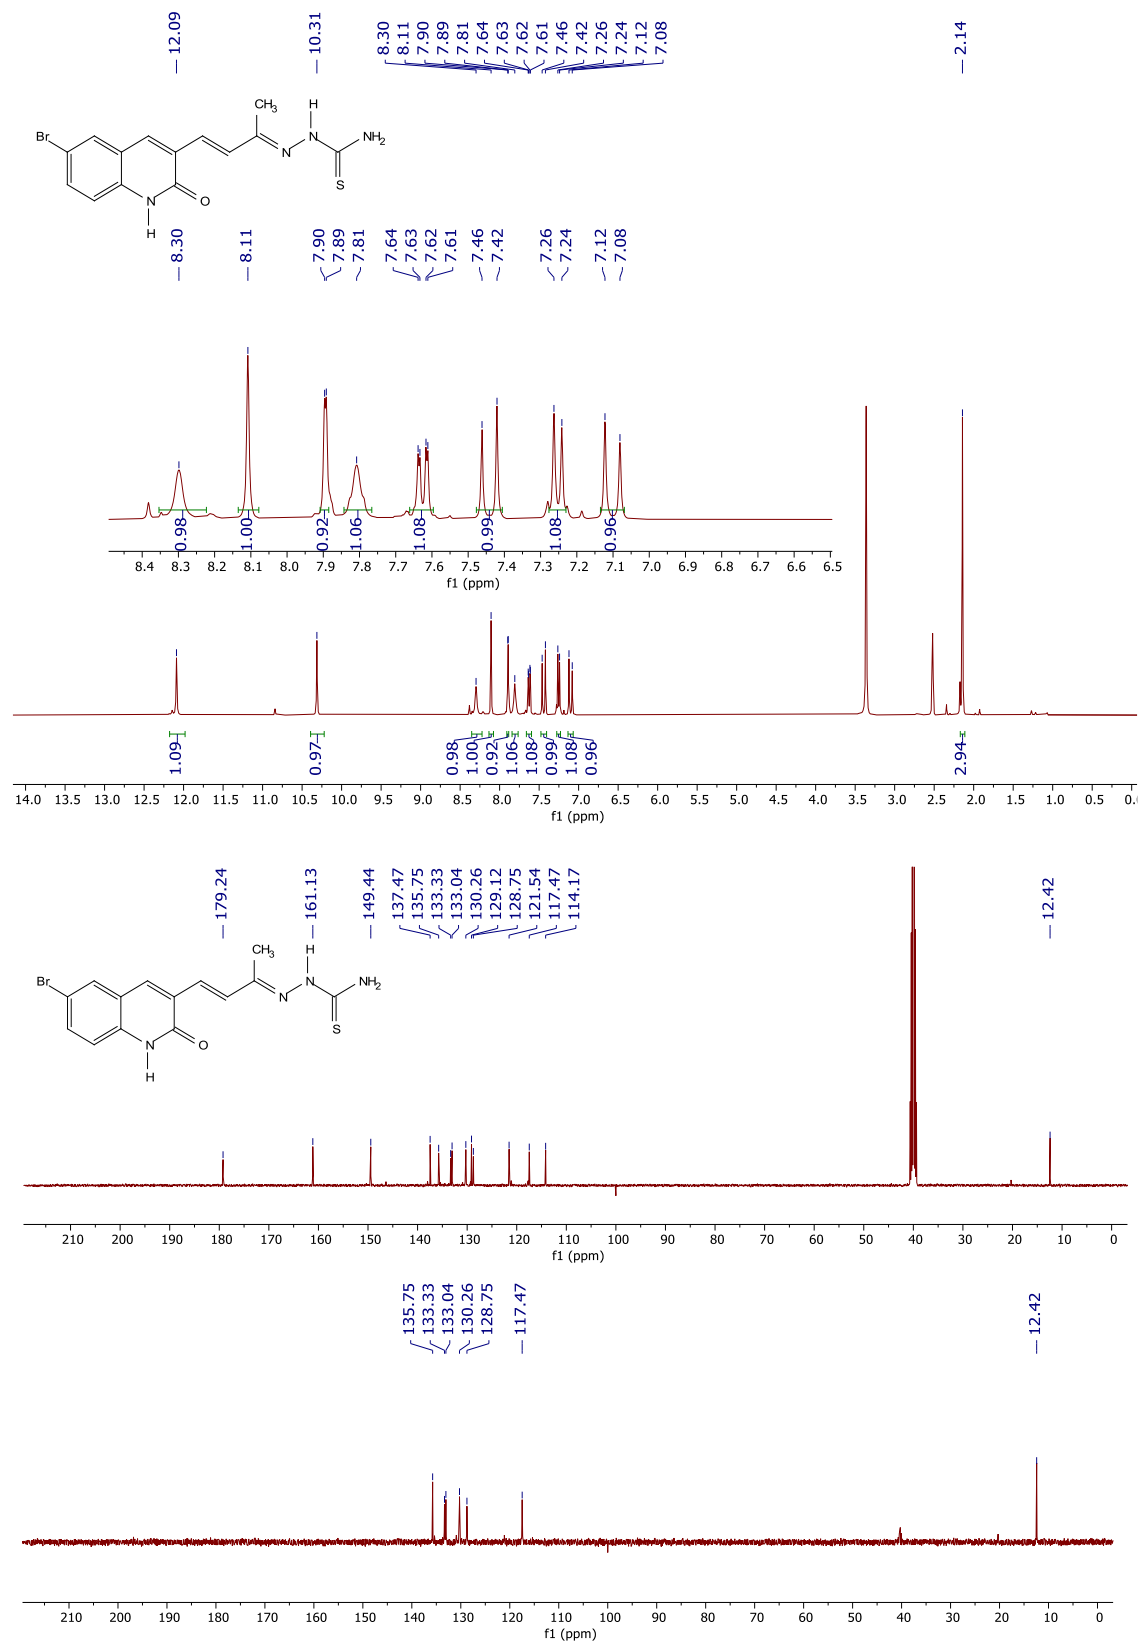

**Figure S7.** <sup>1</sup>H, <sup>13</sup>C NMR and DEPT 135 NMR spectrum of **11e**

**Table S1.** Observed and predictive and experimental activities (and their residuals) of the set of quinoline derivatives

| Compound | MIC( $\mu$ M) | MIC exp               |                  | Residual | Q <sub>Loo</sub> | Residual<br>Q <sub>Loo</sub> |
|----------|---------------|-----------------------|------------------|----------|------------------|------------------------------|
|          |               | (log<br>(1/molarMIC)) | MIC <sub>p</sub> |          |                  |                              |
| 17       | 6.89          | 5.16                  | 5.28             | 0.12     | 5.30             | 0.14                         |
| 18       | 10.65         | 4.97                  | 5.02             | 0.04     | 5.02             | 0.05                         |
| 19*      | 7.26          | 5.13                  | 5.25             | 0.11     | 5.25             | 0.11                         |
| 20       | 6.25          | 5.2                   | 5.43             | -0.06    | 5.13             | -0.07                        |
| 21*      | 6.25          | 5.2                   | 5.14             | -0.06    | 5.13             | -0.07                        |
| 22       | 6.25          | 5.20                  | 5.18             | -0.03    | 5.17             | -0.03                        |
| 23       | 6.25          | 5.20                  | 5.28             | 0.08     | 5.29             | 0.09                         |
| 24*      | 6.25          | 5.20                  | 5.38             | 0.18     | 5.36             | 0.16                         |
| 25       | 6.25          | 5.20                  | 5.33             | 0.13     | 5.40             | 0.20                         |
| 26       | 3.12          | 5.51                  | 5.20             | -0.31    | 5.16             | -0.35                        |
| 27       | 19.33         | 4.71                  | 4.62             | -0.09    | 4.61             | -0.10                        |
| 28       | 10.57         | 4.98                  | 4.76             | -0.22    | 4.69             | -0.28                        |
| 29       | 45.73         | 4.34                  | 4.46             | 0.12     | 4.52             | 0.18                         |
| 30       | 21.75         | 4.66                  | 4.59             | -0.07    | 4.58             | -0.08                        |
| 31       | 20.74         | 4.68                  | 4.57             | -0.11    | 4.56             | -0.13                        |
| 32       | 35.77         | 4.45                  | 4.59             | 0.14     | 4.64             | 0.20                         |
| 33       | 11.11         | 4.95                  | 5.05             | 0.09     | 5.06             | 0.11                         |
| 34*      | 21.75         | 4.66                  | 4.92             | 0.26     | 4.90             | 0.24                         |
| 35*      | 8.48          | 5.07                  | 4.88             | -0.20    | 4.87             | -0.20                        |
| 36       | 16.76         | 4.78                  | 4.89             | 0.12     | 4.91             | 0.13                         |
| 37*      | 17.54         | 4.76                  | 4.80             | 0.05     | 4.82             | 0.06                         |
| 38       | 30.92         | 4.51                  | 4.64             | 0.13     | 4.65             | 0.14                         |
| 39       | 33.53         | 4.47                  | 4.56             | 0.08     | 4.57             | 0.09                         |
| 40       | 35.07         | 4.46                  | 4.57             | 0.12     | 4.60             | 0.14                         |
| 41       | 14.98         | 4.82                  | 4.66             | -0.16    | 4.65             | -0.18                        |
| 42       | 65.37         | 4.18                  | 4.40             | 0.21     | 4.45             | 0.27                         |

|            |       |      |      |       |      |       |
|------------|-------|------|------|-------|------|-------|
| <b>43*</b> | 64.42 | 4.19 | 4.27 | 0.08  | 4.29 | 0.10  |
| <b>44</b>  | 33.75 | 4.47 | 4.25 | -0.22 | 4.18 | -0.29 |
| <b>39*</b> | 18.42 | 4.73 | 4.69 | -0.04 | 4.65 | -0.08 |
| <b>40*</b> | 16.72 | 4.78 | 4.74 | -0.03 | 4.65 | -0.12 |
| <b>41</b>  | 5.73  | 5.24 | 5.08 | -0.16 | 5.01 | -0.23 |
| <b>42</b>  | 11.34 | 4.95 | 5.00 | 0.06  | 5.02 | 0.08  |

*\*Denotes the prediction; Residual= MICp-MICexp; Residual  $Q_{Loo}=Q_{loo}$ -MICexp*
